# Supplementary material
Source: PubMed Central journal article supplement (PMC7373300)

Figure S1

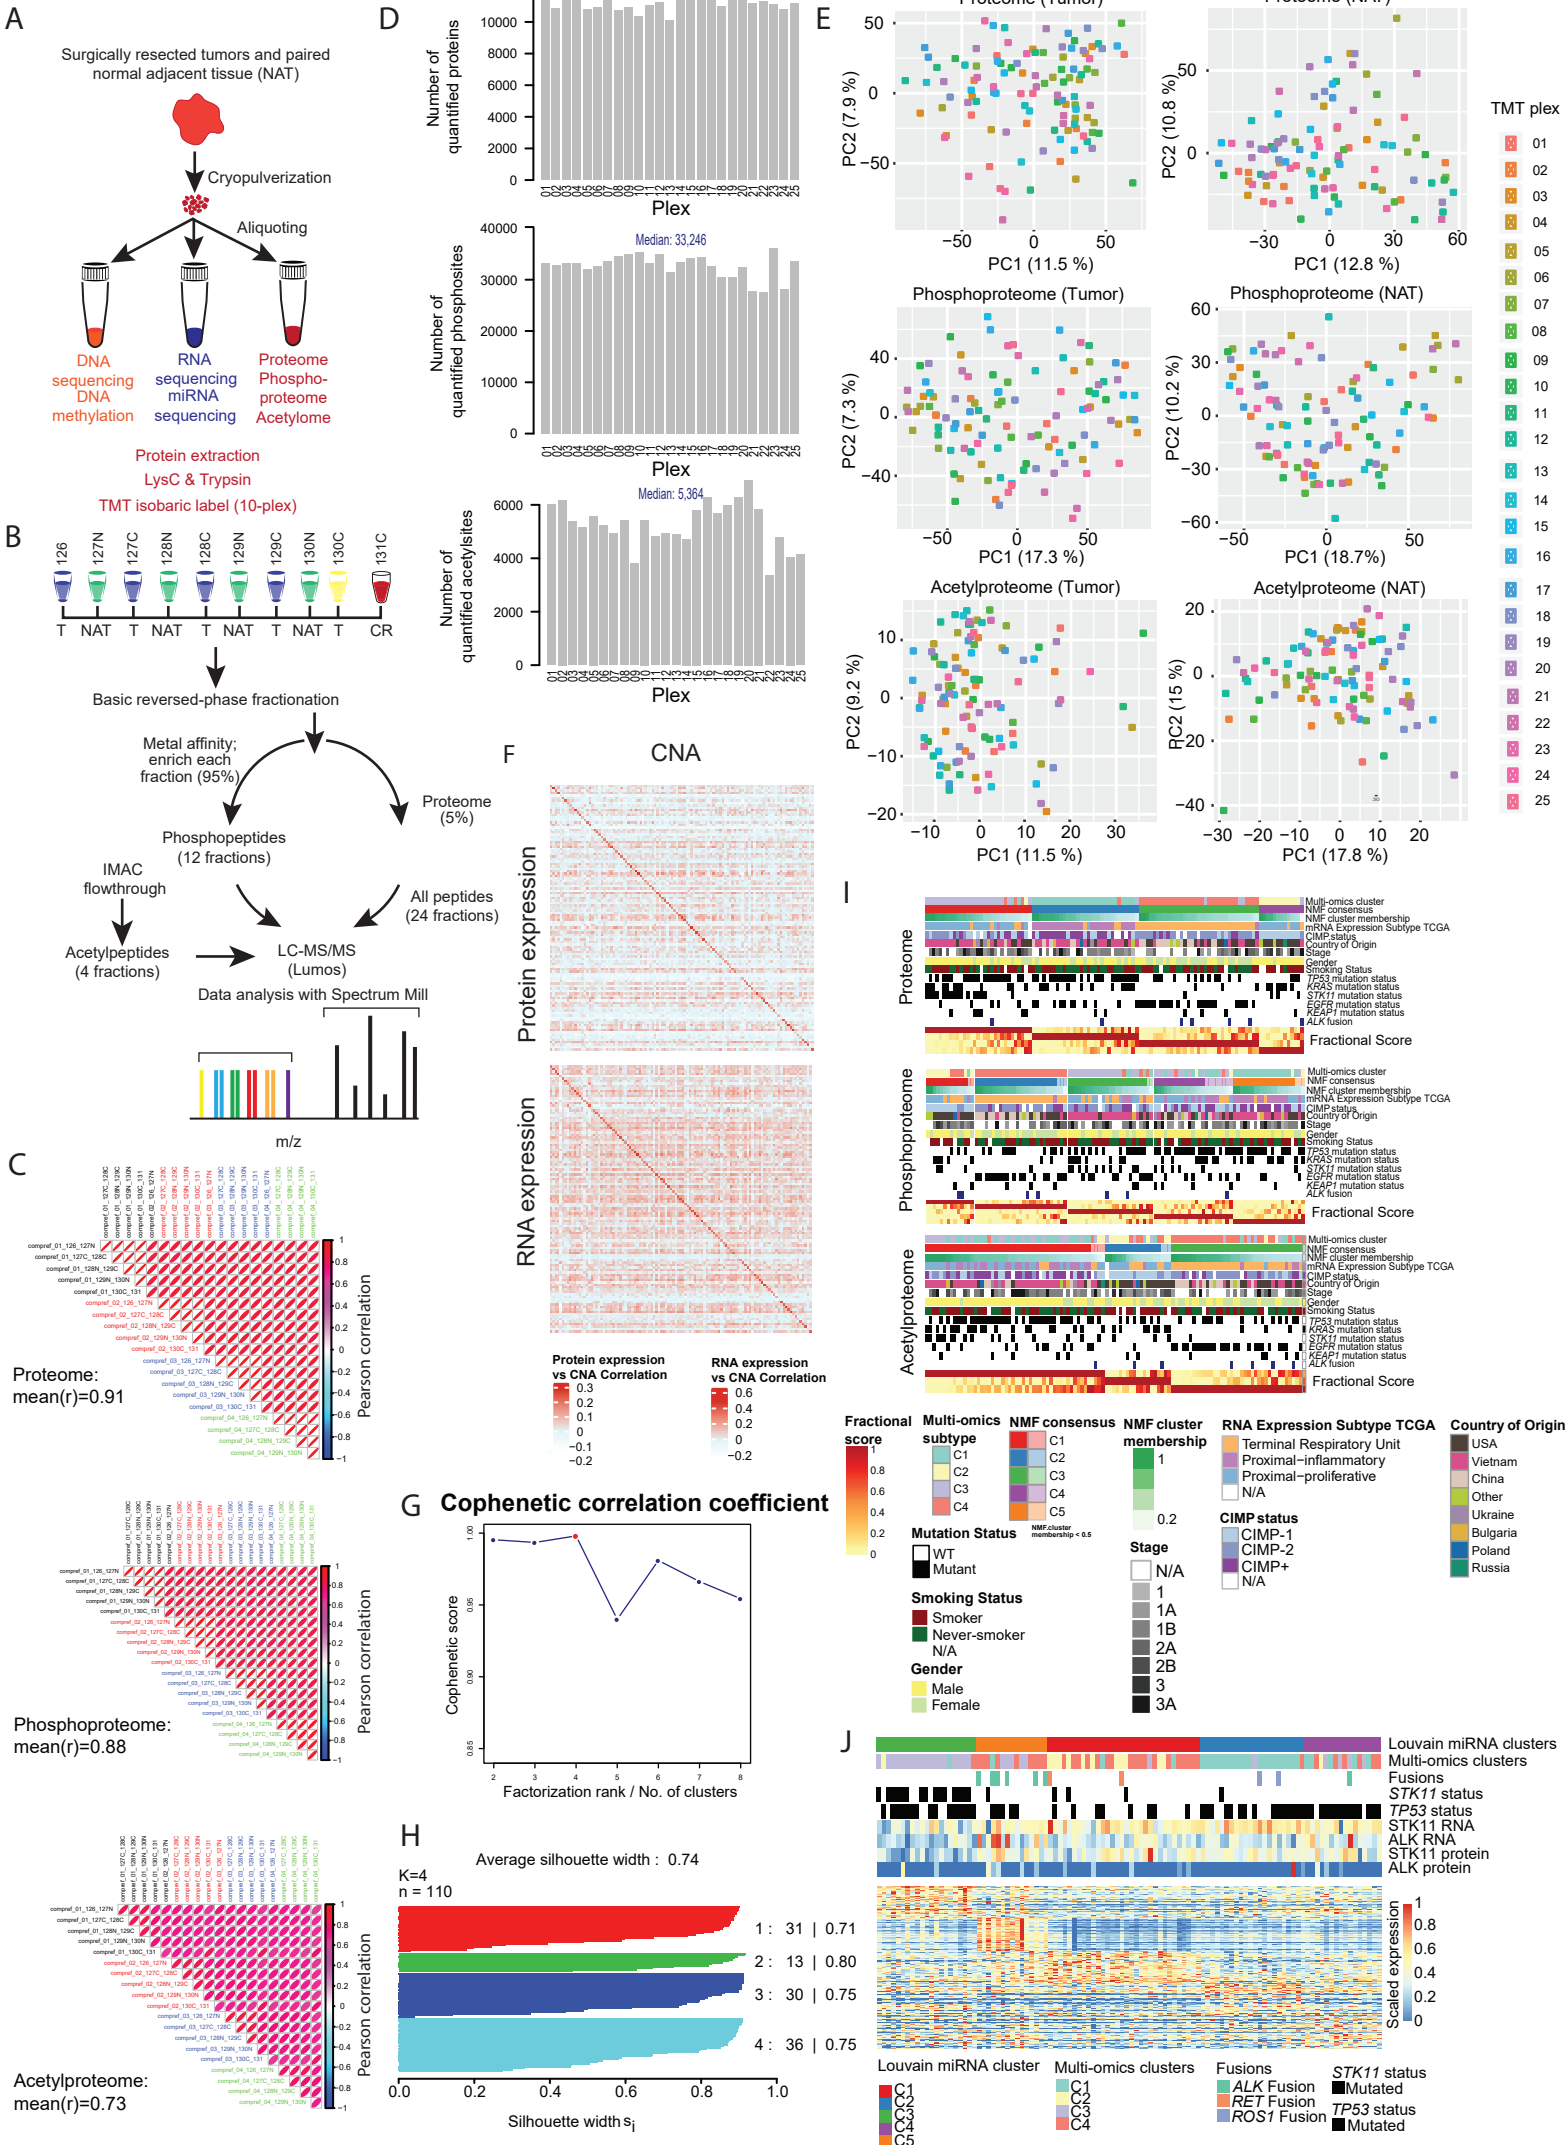

Supplement: NIHMS1603117-supplement-1.pdf [file NIHMS1603117-supplement-1.pdf]

Figure S2

A

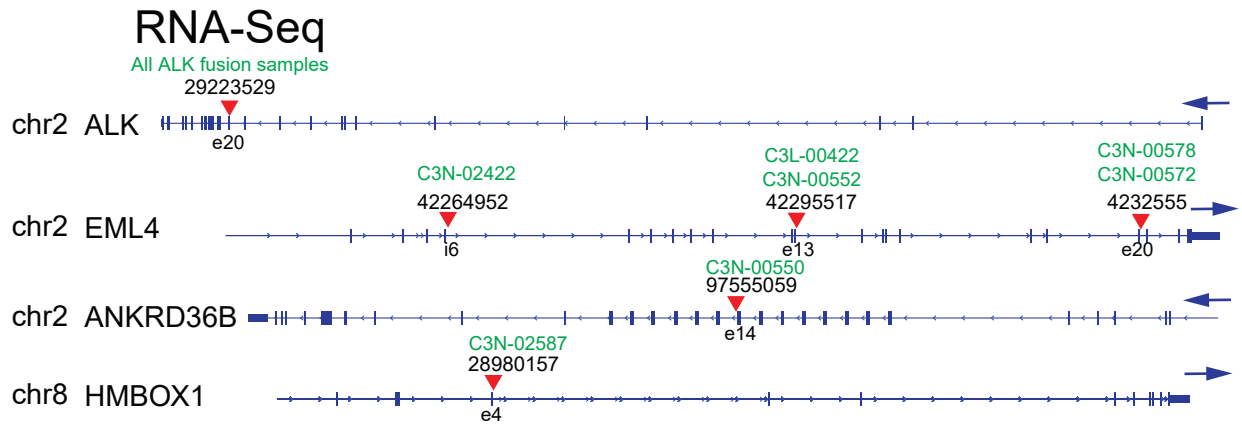

B

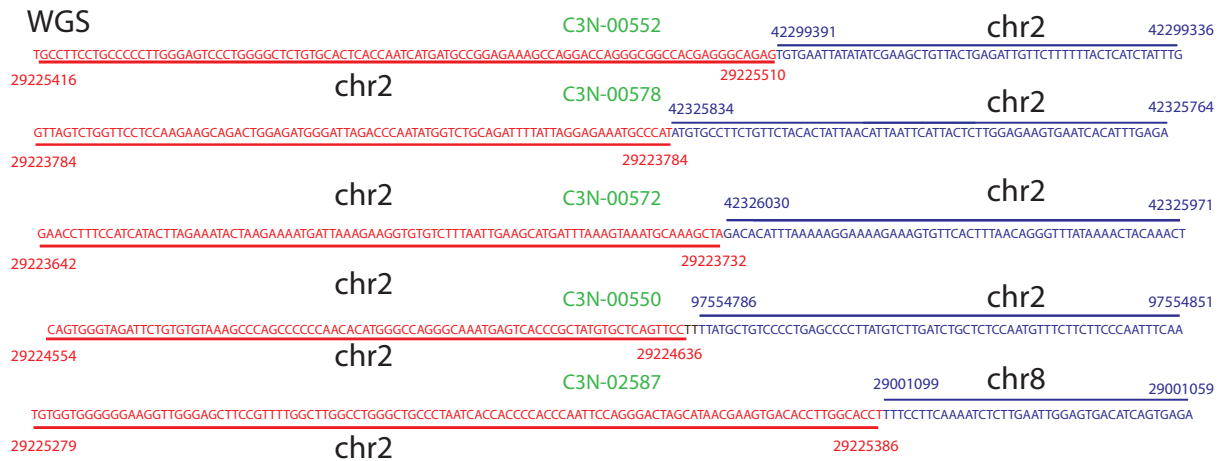

C

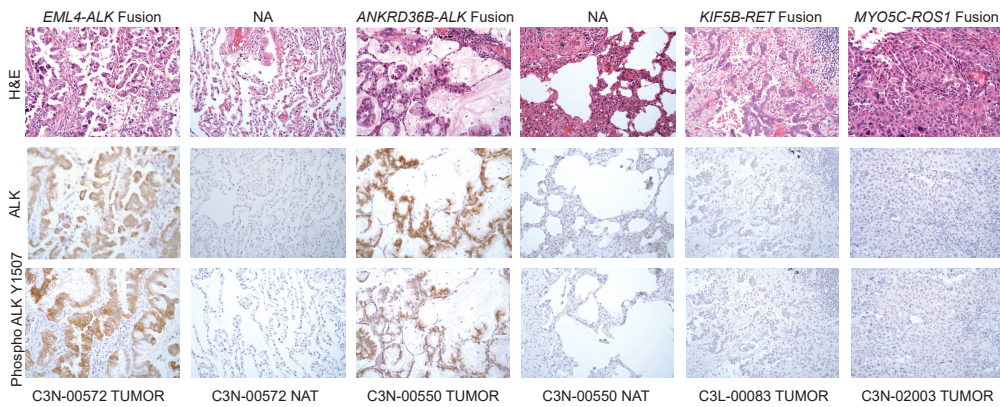

Supplement: NIHMS1603117-supplement-2.pdf [file NIHMS1603117-supplement-2.pdf]

# Figure S3

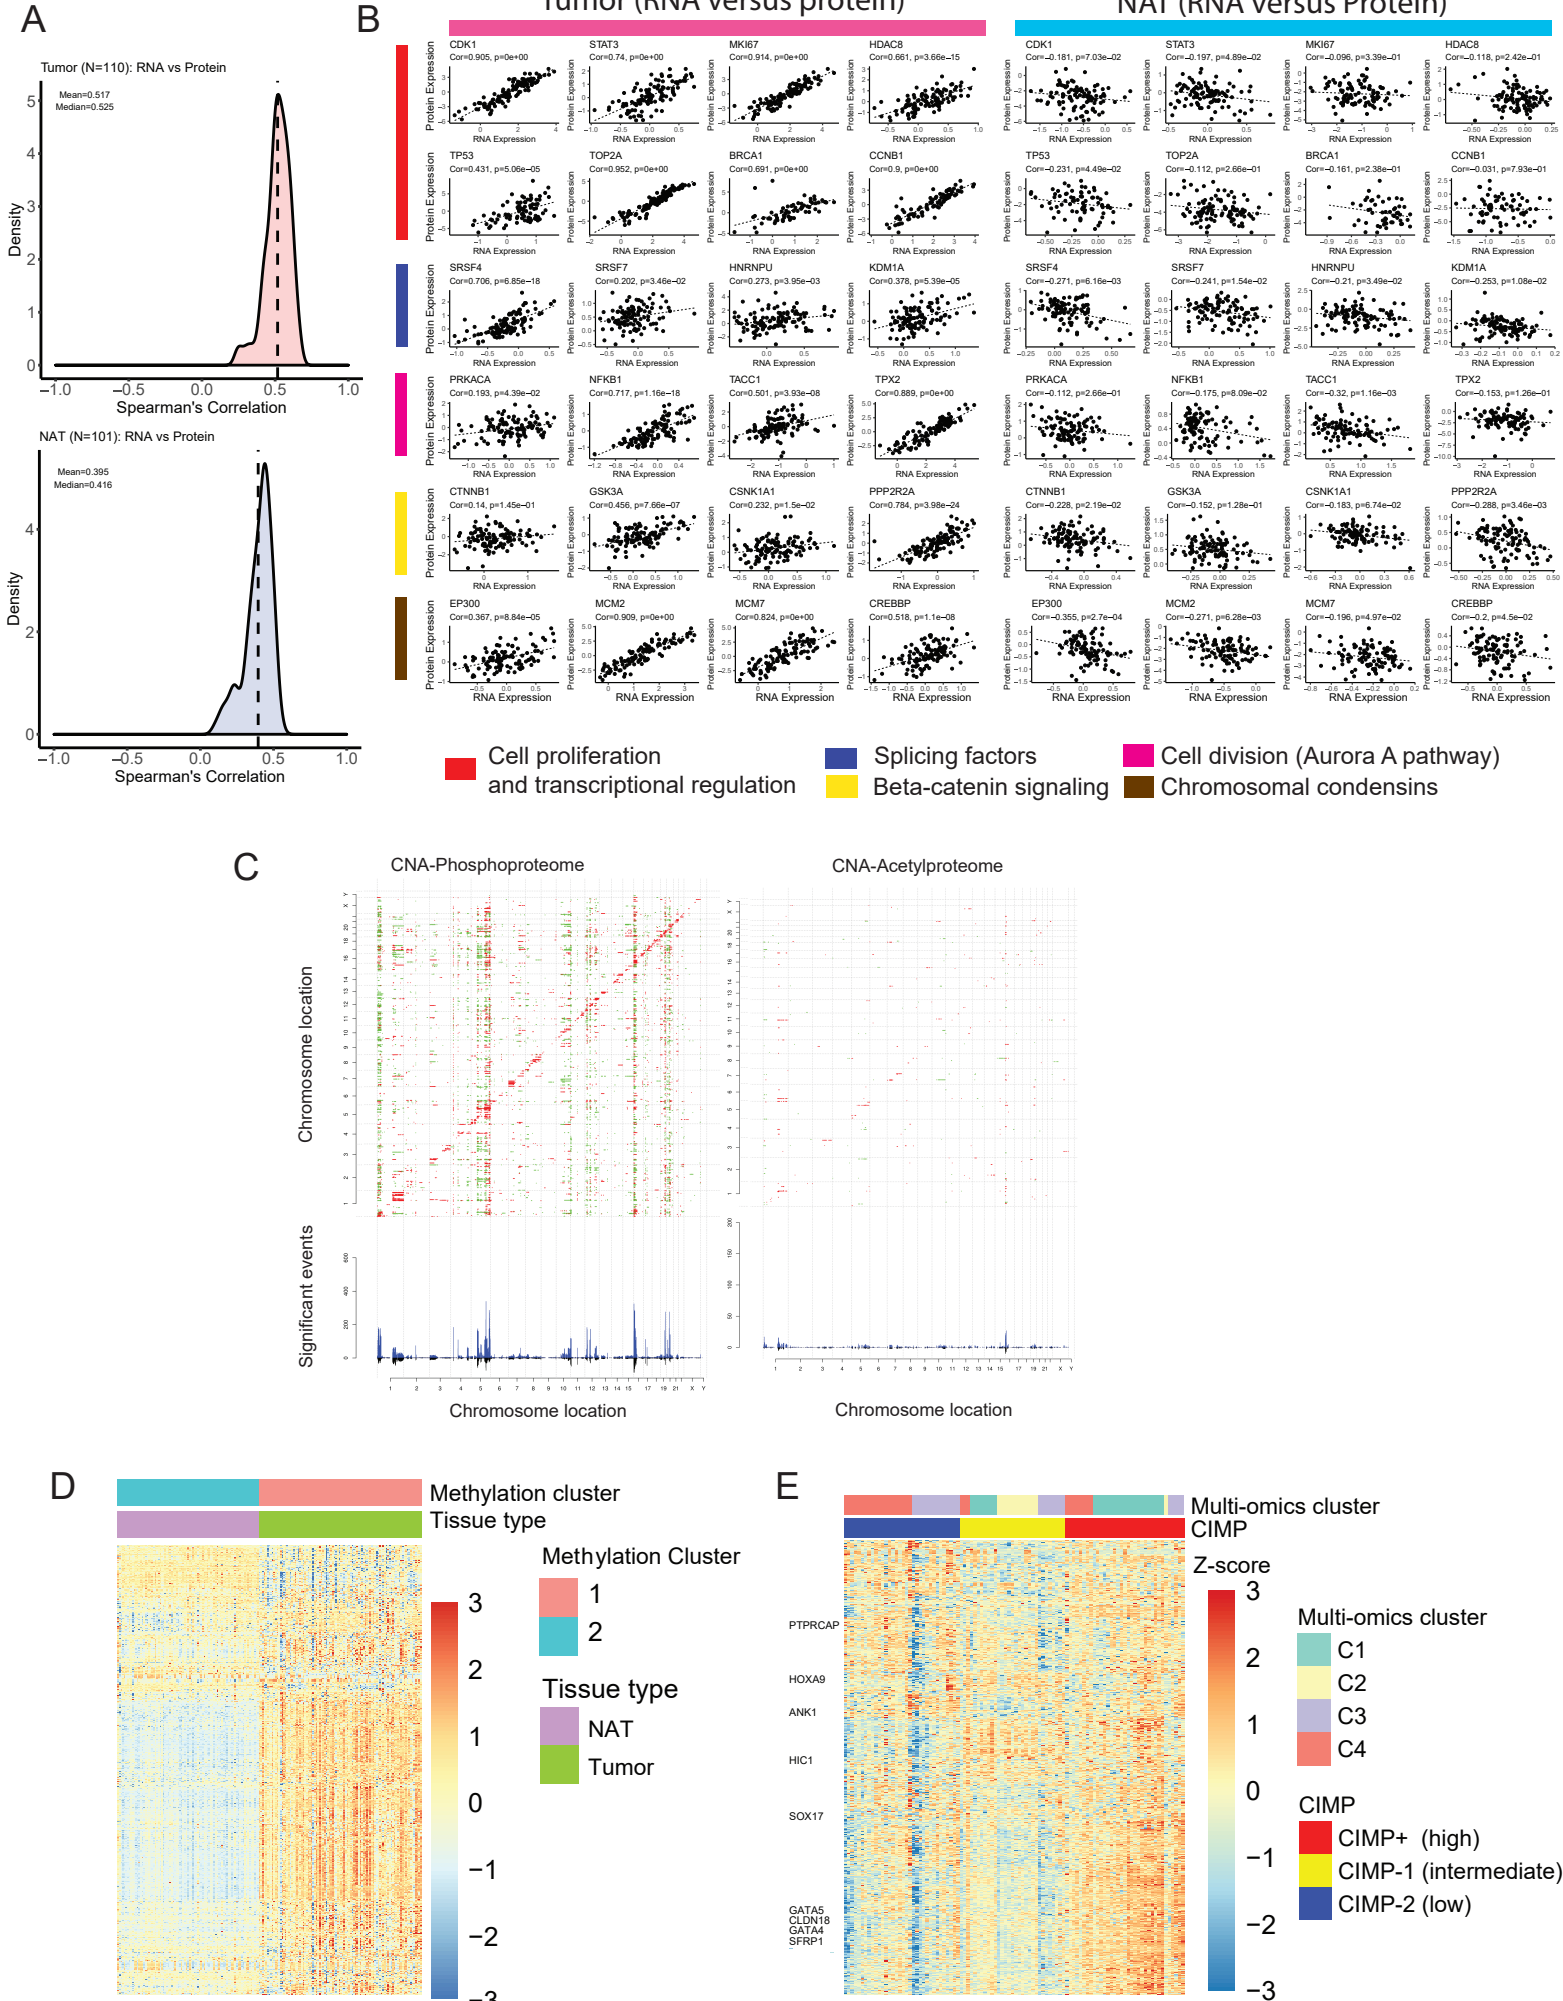

Supplement: NIHMS1603117-supplement-3.pdf [file NIHMS1603117-supplement-3.pdf]

Figure S4

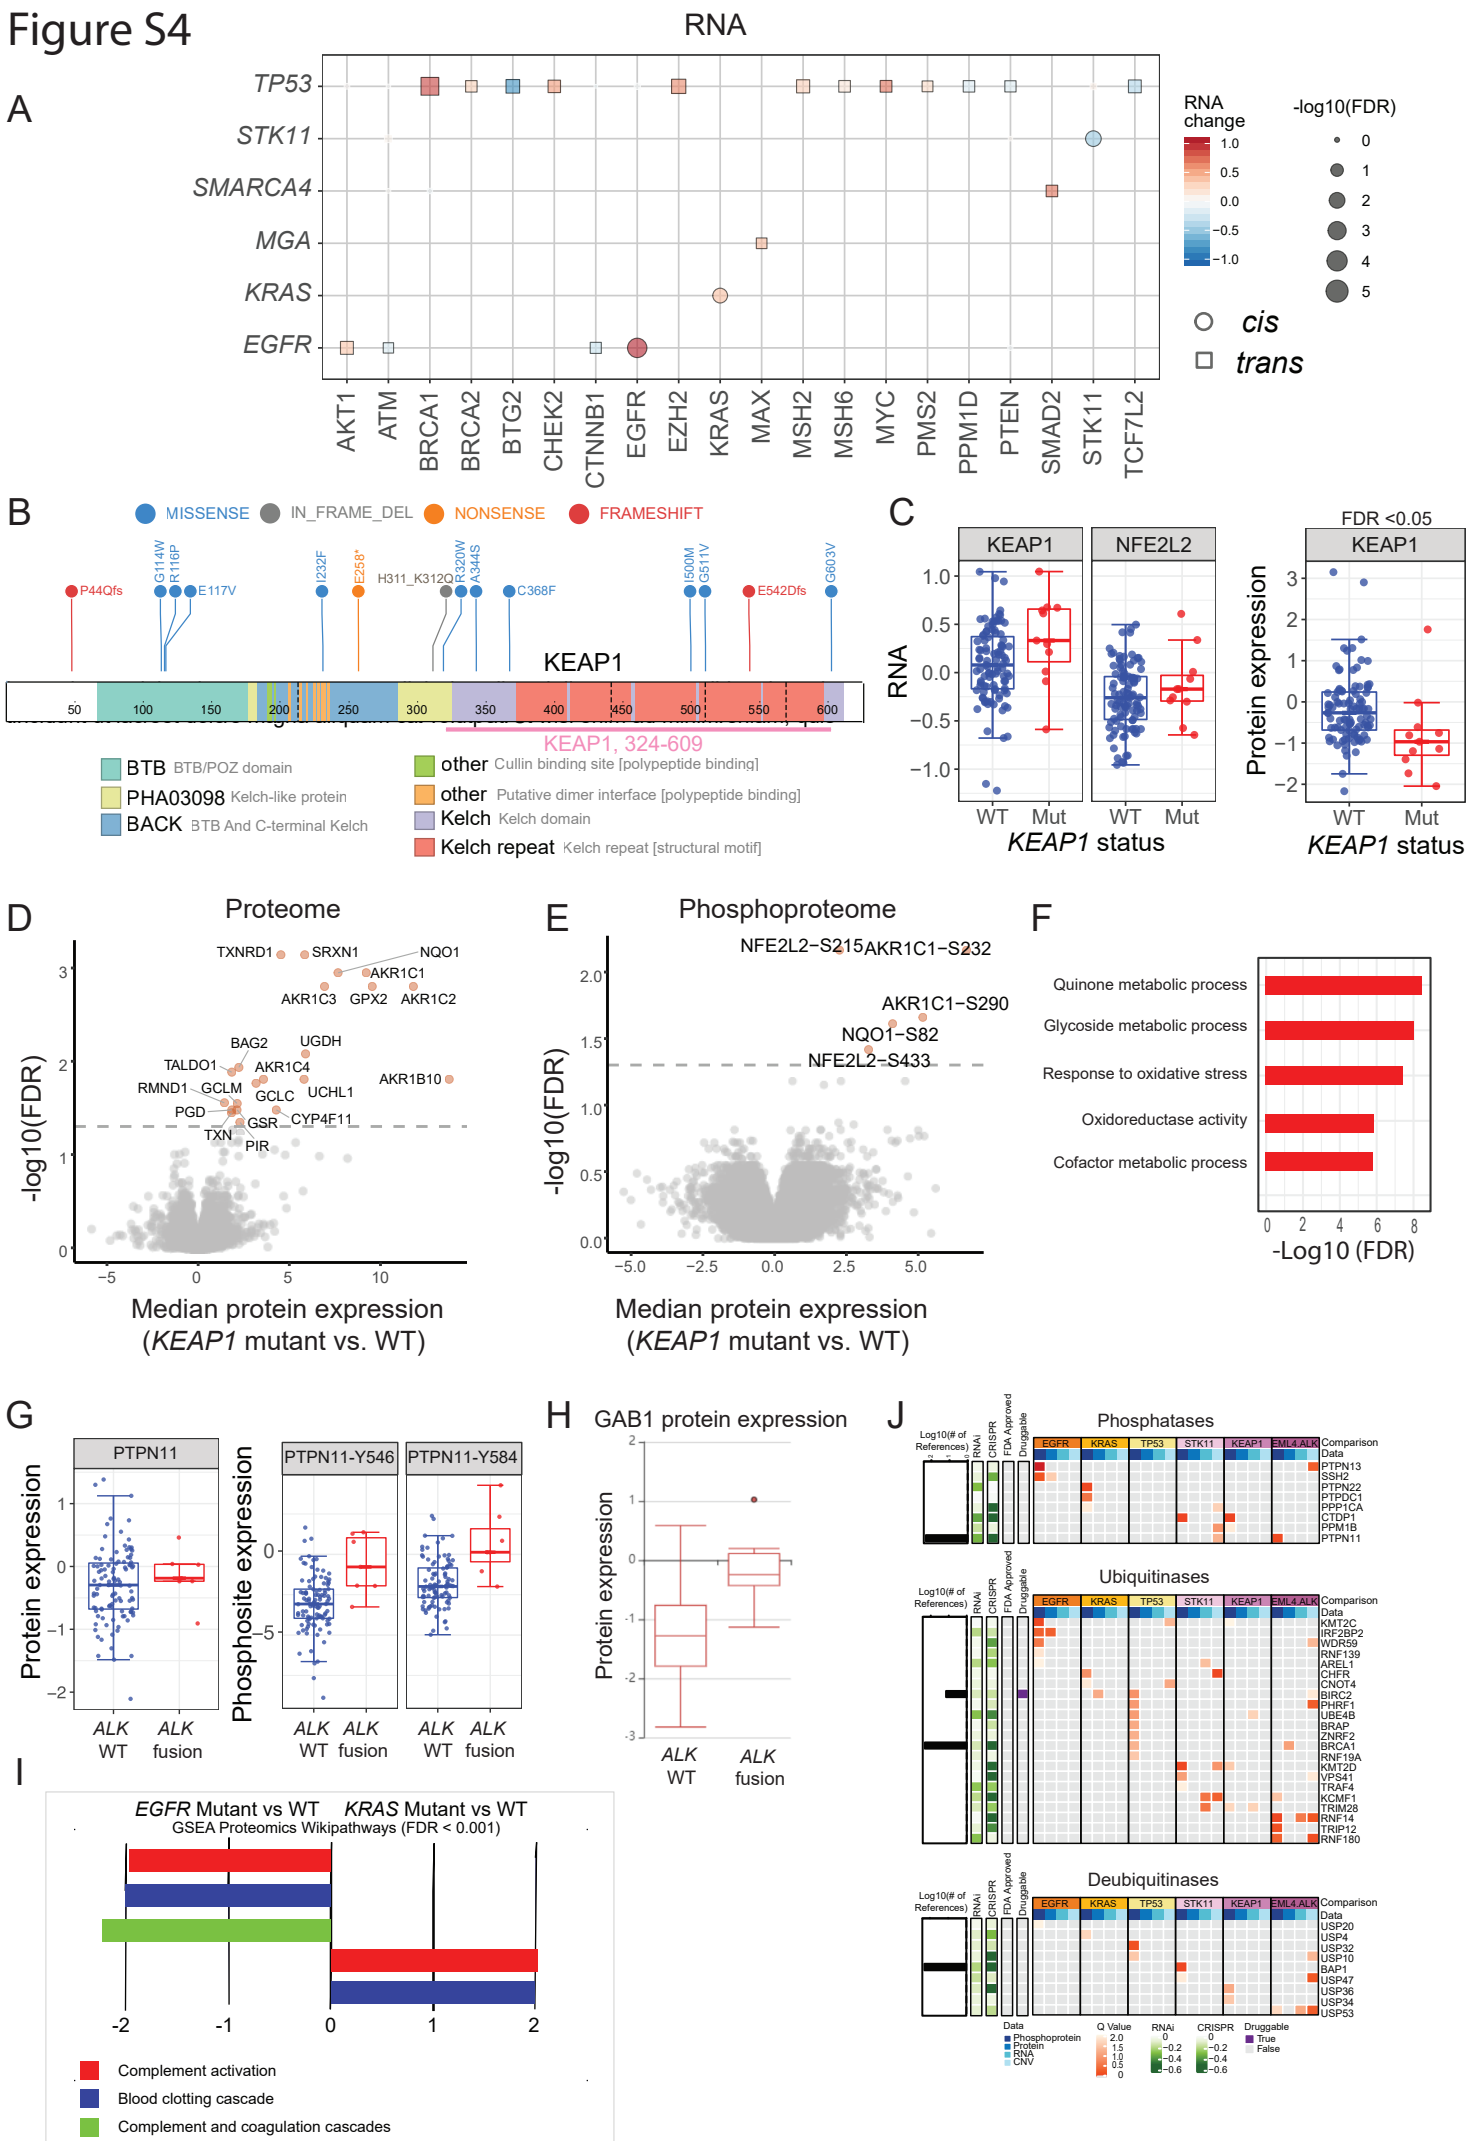

Supplement: NIHMS1603117-supplement-4.pdf [file NIHMS1603117-supplement-4.pdf]

Figure S5

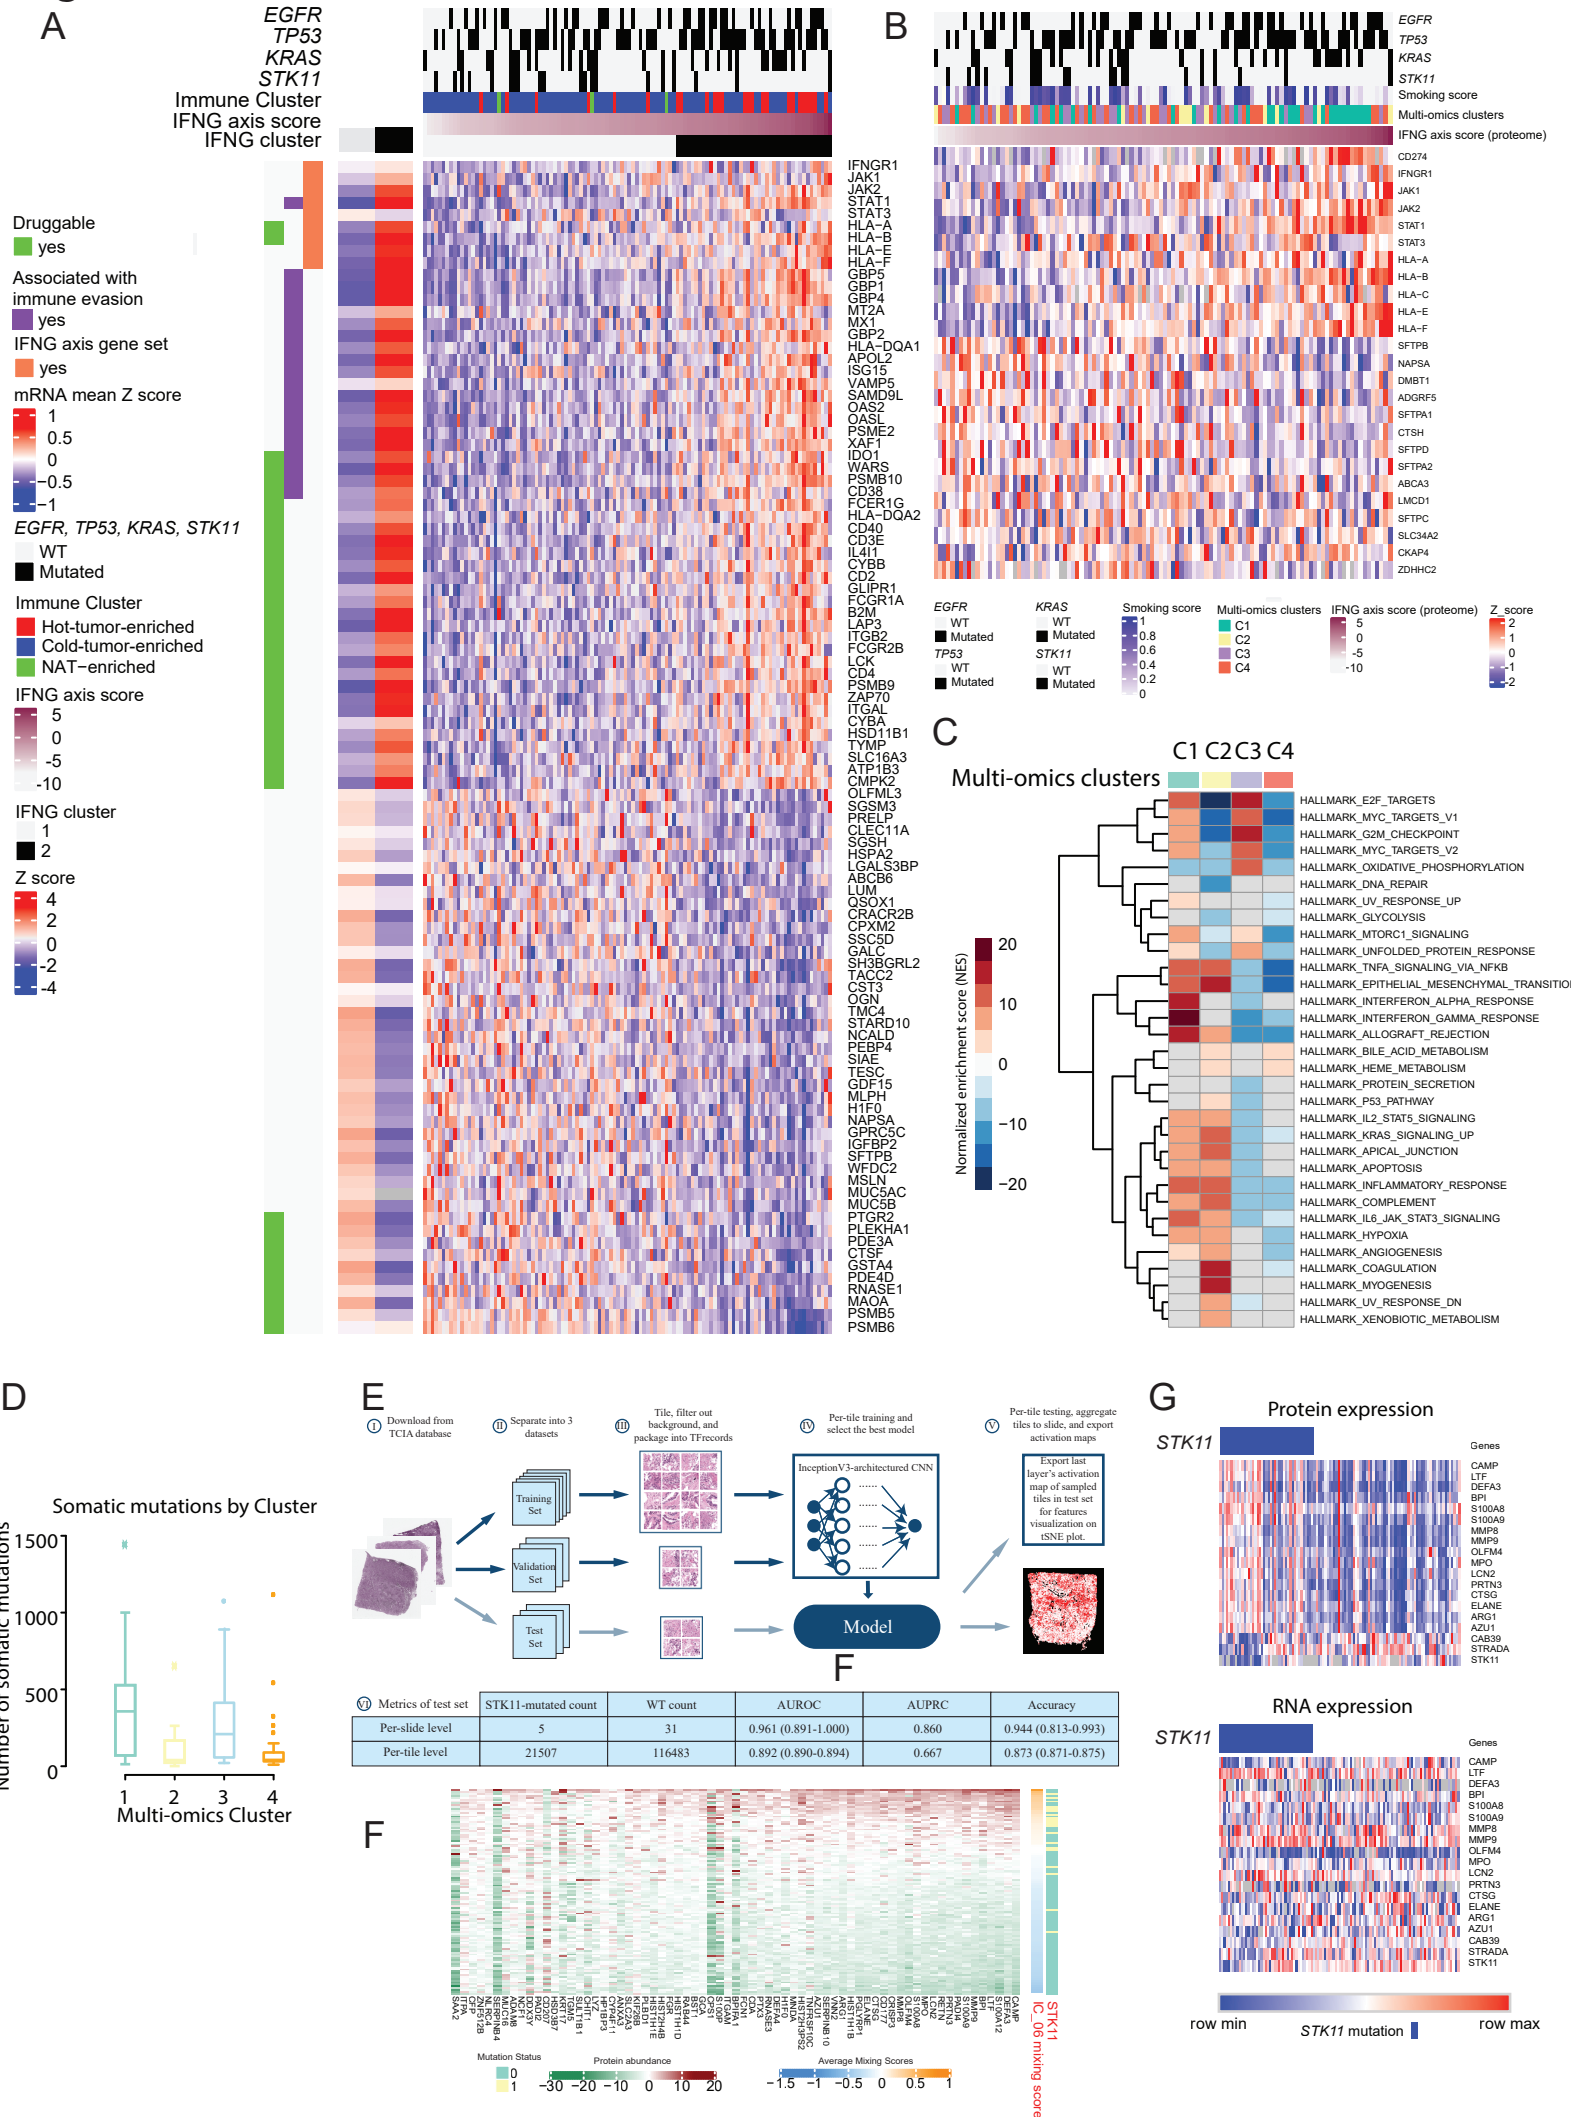

Supplement: NIHMS1603117-supplement-5.pdf [file NIHMS1603117-supplement-5.pdf]

Figure S6

A

Mutation Signatures in CPTAC LUAD WGS

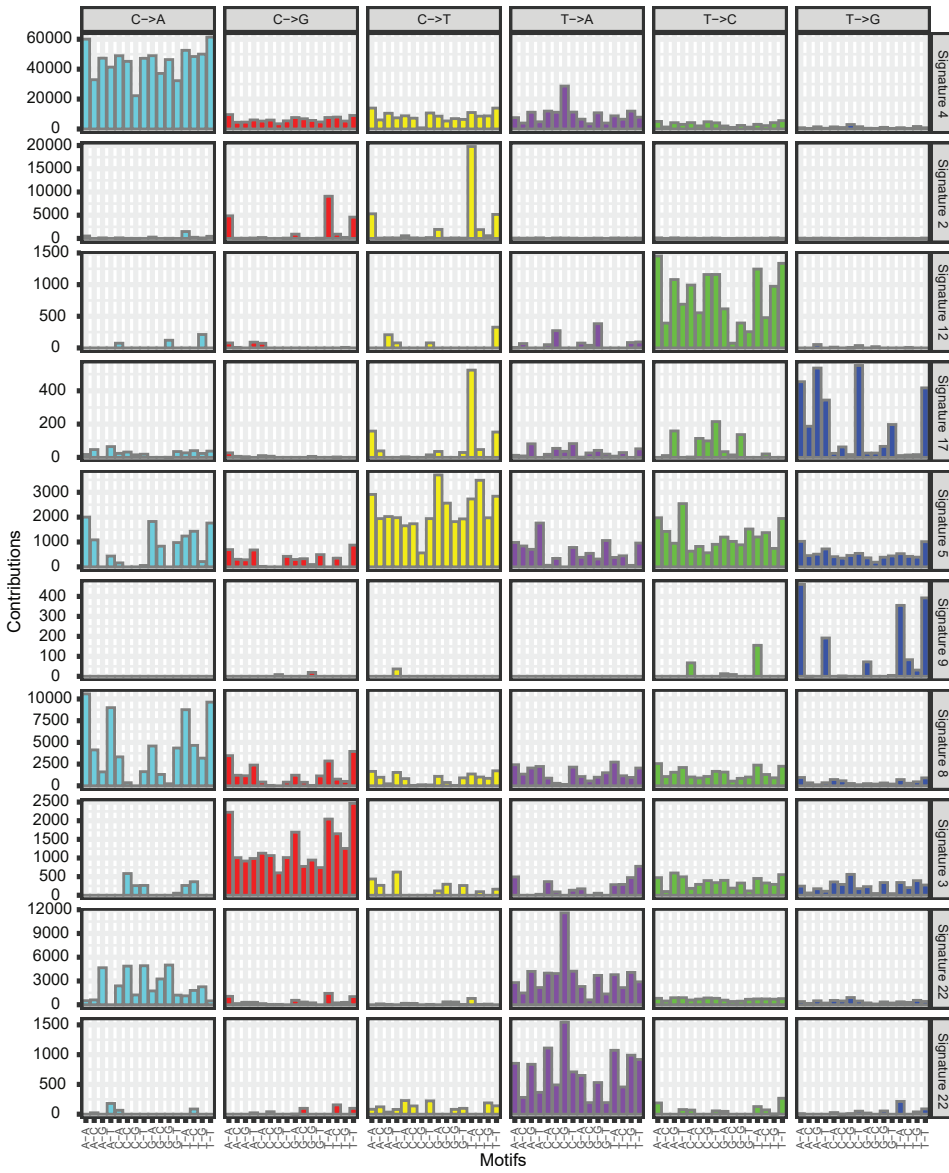

C

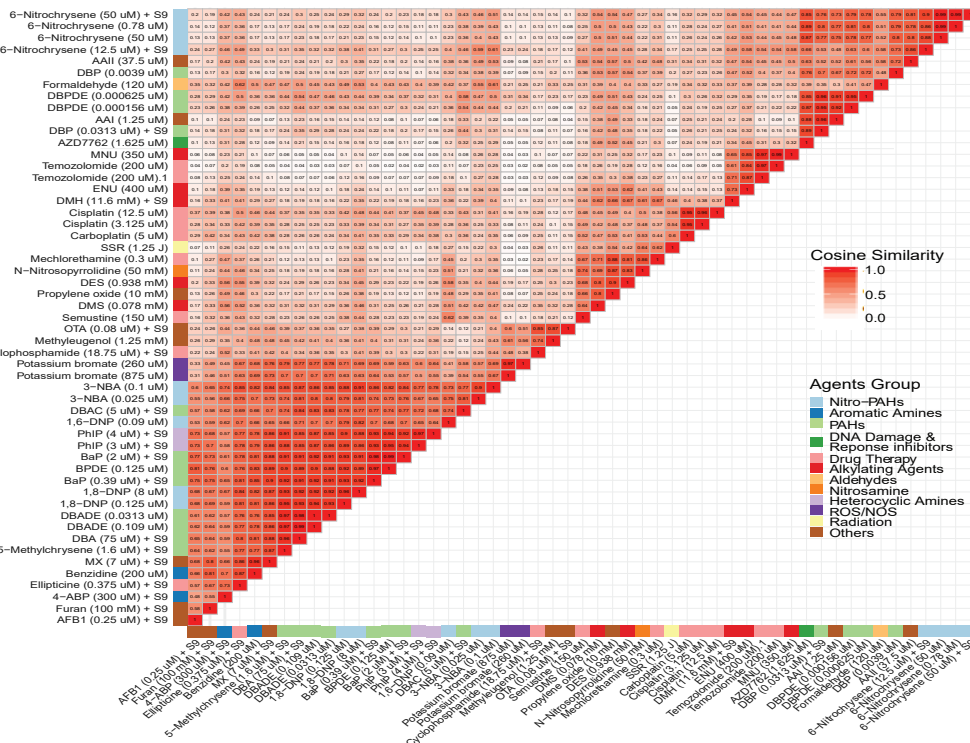

B

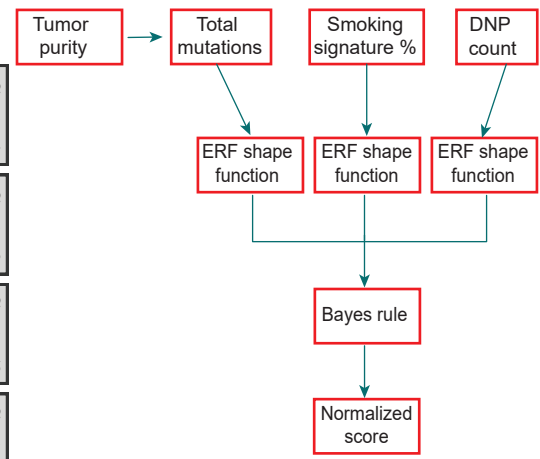

D

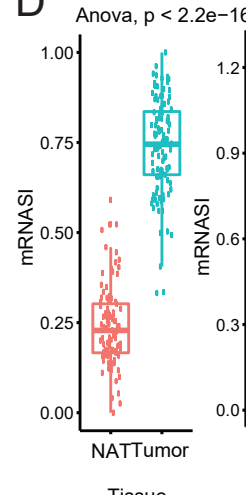

E

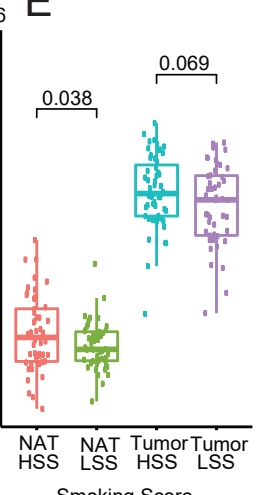

F

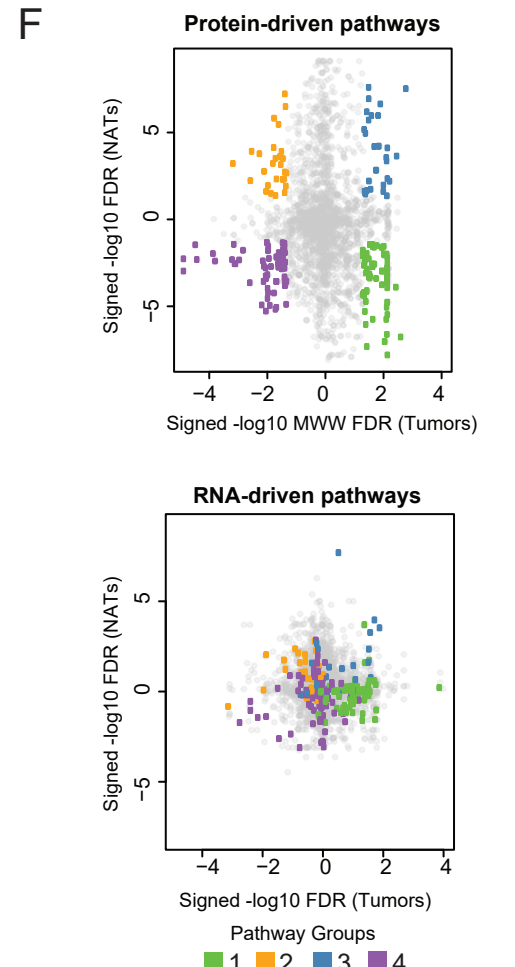

Supplement: NIHMS1603117-supplement-6.pdf [file NIHMS1603117-supplement-6.pdf]

Figure S7

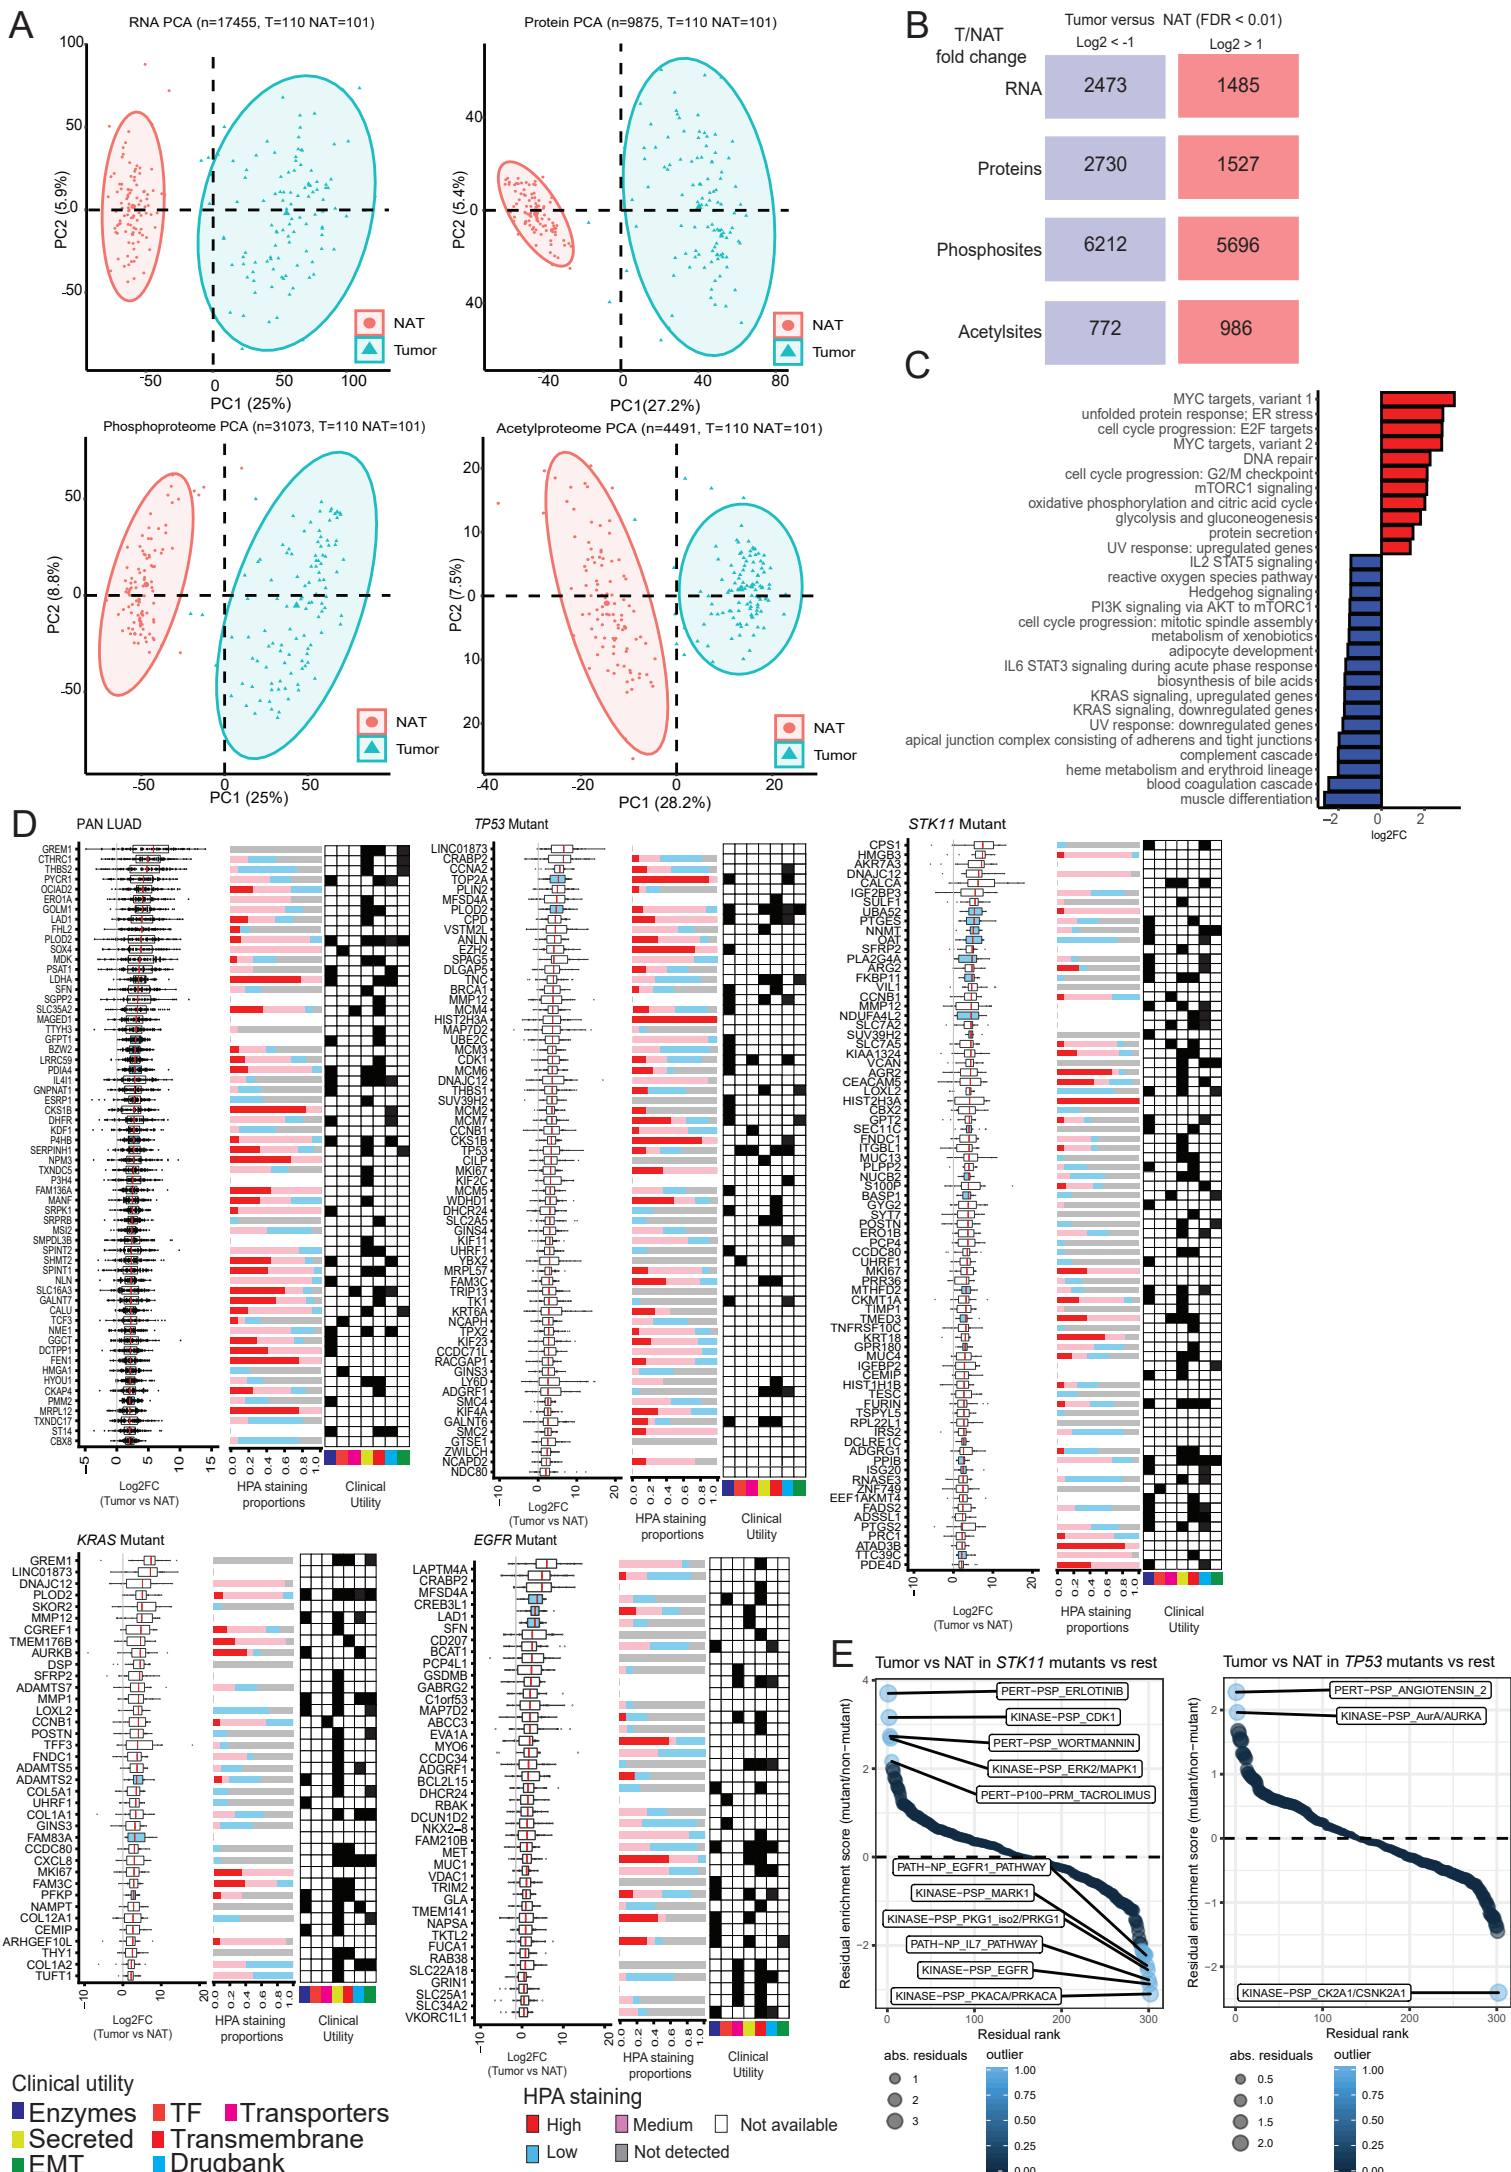

Supplement: NIHMS1603117-supplement-7.pdf [file NIHMS1603117-supplement-7.pdf]
